# Supplementary material for: Broadband slow light in one-dimensional logically combined photonic crystals
Source: Royal Society of Chemistry journal article supplement (doi:10.1039/c4nr05810k), 2014-11-28
Supplement: c4nr05810k1.pdf [file c4nr05810k1.pdf]

## **Supplement Information**

### **Broadband Slow Light in One – Dimensional Logically Combined Photonic Crystals**

G. Alagappan\* and C. E. Png

Department of Electronics and Photonics, Institute of High Performance Computing, Agency  
for Science, Technology, and Research (A-STAR), Fusionopolis, 1 Fusionopolis Way, #16-  
16 Connexis, Singapore 138632

\*Corresponding author: [gandhi@ihpc.a-star.edu.sg](mailto:gandhi@ihpc.a-star.edu.sg)

## **Bloch mode decomposition technique**

Here, we will describe the details of the Bloch mode decomposition technique. This technique is used to calculate the Bloch mode expansion coefficient,  $a_n$ . [see Figure 2(e)]. The modes of PC1 are Bloch modes. Each of the Bloch mode can be identified with a pair of indices that denote the band index,  $n$ , and the wavevector,  $k$ . The Bloch mode,  $\phi_{n,k}(x)$ , of PC1 with frequency  $\omega_{n,k}$ , satisfy the 1D time – independent Maxwell's equation,

$$\left[ \frac{d^2}{dx^2} + \frac{\omega_{n,k}^2}{c^2} \varepsilon_1(x) \right] \phi_{n,k}(x) = 0 \quad [\text{S1}],$$

where  $\varepsilon_1(x)$  is the dielectric function of PC1. The Bloch modes of PC1 obey the orthogonalization condition,

$$\frac{1}{a} \int_{-a/2}^{a/2} \phi_{m,k'}^*(x) \varepsilon_1(x) \phi_{n,k}(x) dx = \delta_{mn,kk'} \quad [\text{S2}].$$

Let us expand the electric field,  $E(x)$ , in the LCPC using the complete set of PC1's Bloch modes:

$$E(x) = \sum_{n,k} a_{n,k} \phi_{n,k}(x) \quad [\text{S3}].$$

This electric field obeys the 1D time – independent Maxwell's equation,

$$\left[ \frac{d^2}{dx^2} + \frac{\omega^2}{c^2} \varepsilon(x) \right] E(x) = 0 \quad [\text{S4}],$$

where  $\varepsilon(x)$  is the dielectric function of the LCPC. Expressing  $\varepsilon(x) = \varepsilon_1(x) + \varepsilon_p(x)$ , and using Eqns. S1 – S3, we can transform Eqn. S4, into a system of linear equations,

$$\frac{1}{a_s} \sum_{n,k} a_{n,k} \int_{-a_s/2}^{a_s/2} \phi_{m,k'}^*(x) \varepsilon_p(x) \phi_{n,k}(x) dx = \left( \frac{\omega_{m,k'}^2}{\omega^2} - 1 \right) a_{m,k'} \quad [\text{S5}].$$

Writing  $\frac{1}{a_s} \int_{-a_s/2}^{a_s/2} \phi_{m,k'}^*(x) \varepsilon_p(x) \phi_{n,k}(x) dx$  as  $\langle \phi_{m,k'}^* | \varepsilon_p | \phi_{n,k} \rangle$ , and re-arranging Eqn. S5, we arrive

at the following symmetrical eigenvalue problem,

$$\sum_{n,k} \frac{\langle \phi_{m,k'}^* | \varepsilon_p | \phi_{n,k} \rangle + \delta_{mn,kk'}}{\omega_{m,k'} \omega_{n,k}} [a_{n,k} \omega_{n,k}] = \frac{c^2}{\omega^2} a_{m,k'} \omega_{m,k'} \quad [\text{S6}],$$

with the eigenvalues  $c^2/\omega^2$ .

Before proceeding, let us examine the term,  $\langle \phi_{m,k'}^* | \varepsilon_p | \phi_{n,k} \rangle$ , in Eqn. S6. This term describes the coupling of PC1's Bloch mode due to the perturbation,  $\varepsilon_p(x)$ . Since, the period of  $\varepsilon_p(x)$  is equal to  $a_s = Ra$ , the conservation of the translational symmetry requires  $k - k'$  to be multiples of  $g = 2\pi/a_s = 2\pi/Ra$ . This means, different Bloch modes of PC1 will couple to each other, only if their wavevectors differ by multiples of  $g$ . [i.e.,  $\langle \phi_{m,k'}^* | \varepsilon_p | \phi_{n,k} \rangle \neq 0$ , only when  $k - k'$  is a multiple of  $g$ ]. At such, it is useful to consider a folded band structure of PC1 [see the main text for the details]. In the folded band structure, the wavevectors of the adjacent bands differ exactly by  $g$ .

For a given wavevector,  $k$ , within the first BZ of the LCPC, the Bloch modes in the same folded cannot couple to each other. Only modes with the same  $k$ , but in different folded bands can couple. Therefore, for a given  $k$ , we can re-write Eqn. S6 using a single index subscript,

$$\sum_n \frac{\langle \phi_m^* | \varepsilon_p | \phi_n \rangle + \delta_{mn}}{\omega_m \omega_n} [a_n \omega_n] = \frac{c^2}{\omega^2} a_m \omega_m \quad [\text{S7}].$$

Here,  $n$  is the index of the folded band. Eqn. S7 can be written in a matrix form as  $\hat{B}\mathbf{v} = [c^2 / \omega^2]\mathbf{v}$ , where  $\mathbf{v} = [a_1\omega_1 \quad a_2\omega_2 \quad \dots]^T$ . Inverting this matrix equation we have,

$$\hat{B}^{-1}\mathbf{v} = [\omega^2 / c^2]\mathbf{v} \quad [\text{S8}].$$

Solving the eigenvalue problem in Eqn. S8, the expansion coefficients  $[a_n]$  can be found. One can also use Eqn. 8 to obtain the band structure of the LCPC. Please take note that, if we express both  $\phi_n$  and  $\varepsilon_p$  in the plane wave basis (i.e., using a Fourier series), then Eqn. S8 will revert to the standard equations that describes the well-known plane wave expansion technique [17]. However, the information on  $a_n$  will be lost in the plane wave basis.
